# Supplementary material
Source: PubMed Central journal article supplement (PMC3258434)
Supplement: Supp_Data.pdf [file Supp_Data.pdf]

## Supplementary Data

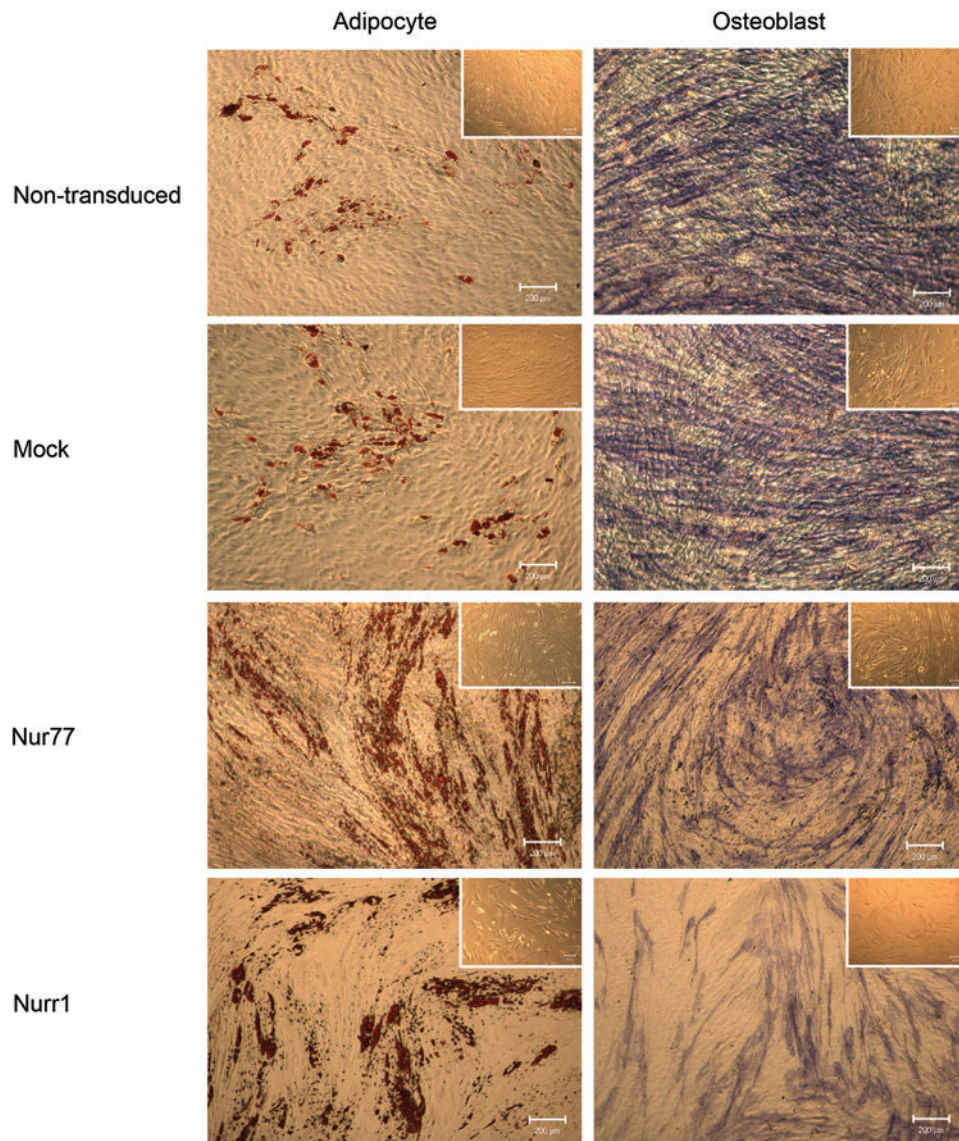

**SUPPLEMENTARY FIG. S1.** Adipocyte and osteoblast differentiation. Adipocyte or osteoblast differentiation was induced in nontransduced FBMSC (*top panels*) and after transduction with mock-, Nur77-, or Nur77-containing lentivirus (representative donor shown; scale bar 200  $\mu$ m). Overexpression of Nur77 or Nurr1 did not impair the differentiation potential of FBMSC. FBMSC, fetal bone marrow mesenchymal stromal cells. Insets depict undifferentiated FBMSC stained for adipocytes or osteoblasts.

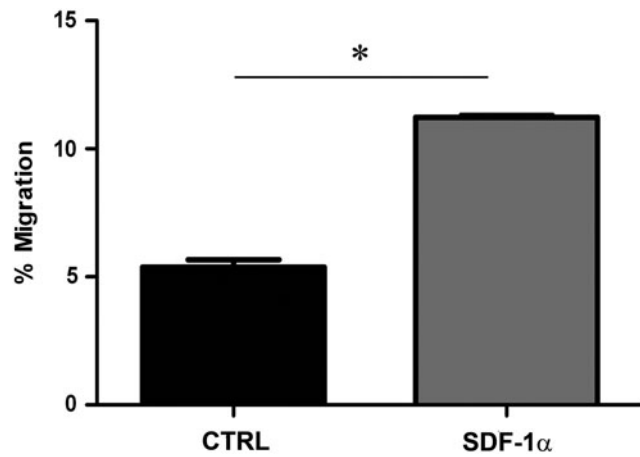

**SUPPLEMENTARY FIG. S2.** SDF-1 $\alpha$ -induced chemotaxis in FBMSC. To confirm SDF-1 $\alpha$ -induced chemotaxis in the experiments from which cells were collected for gene expression profiling, 4 Transwell wells were evaluated to quantify the percentage of SDF-1 $\alpha$ -induced migration. Wild-type FBMSC were allowed to migrate for 4 h toward SDF-1 $\alpha$  (600 ng/mL). Medium alone served as a negative control. The number of migratory cells was counted by fluorescence microscopy. Bars represent the percentage (mean  $\pm$  SD) of migrated MSC related to the cell number loaded in the upper compartment ( $n=4$ ). \* $P \leq 0.05$ . MSC, mesenchymal stromal cells; SDF-1 $\alpha$ , stromal cell-derived factor 1 $\alpha$ .

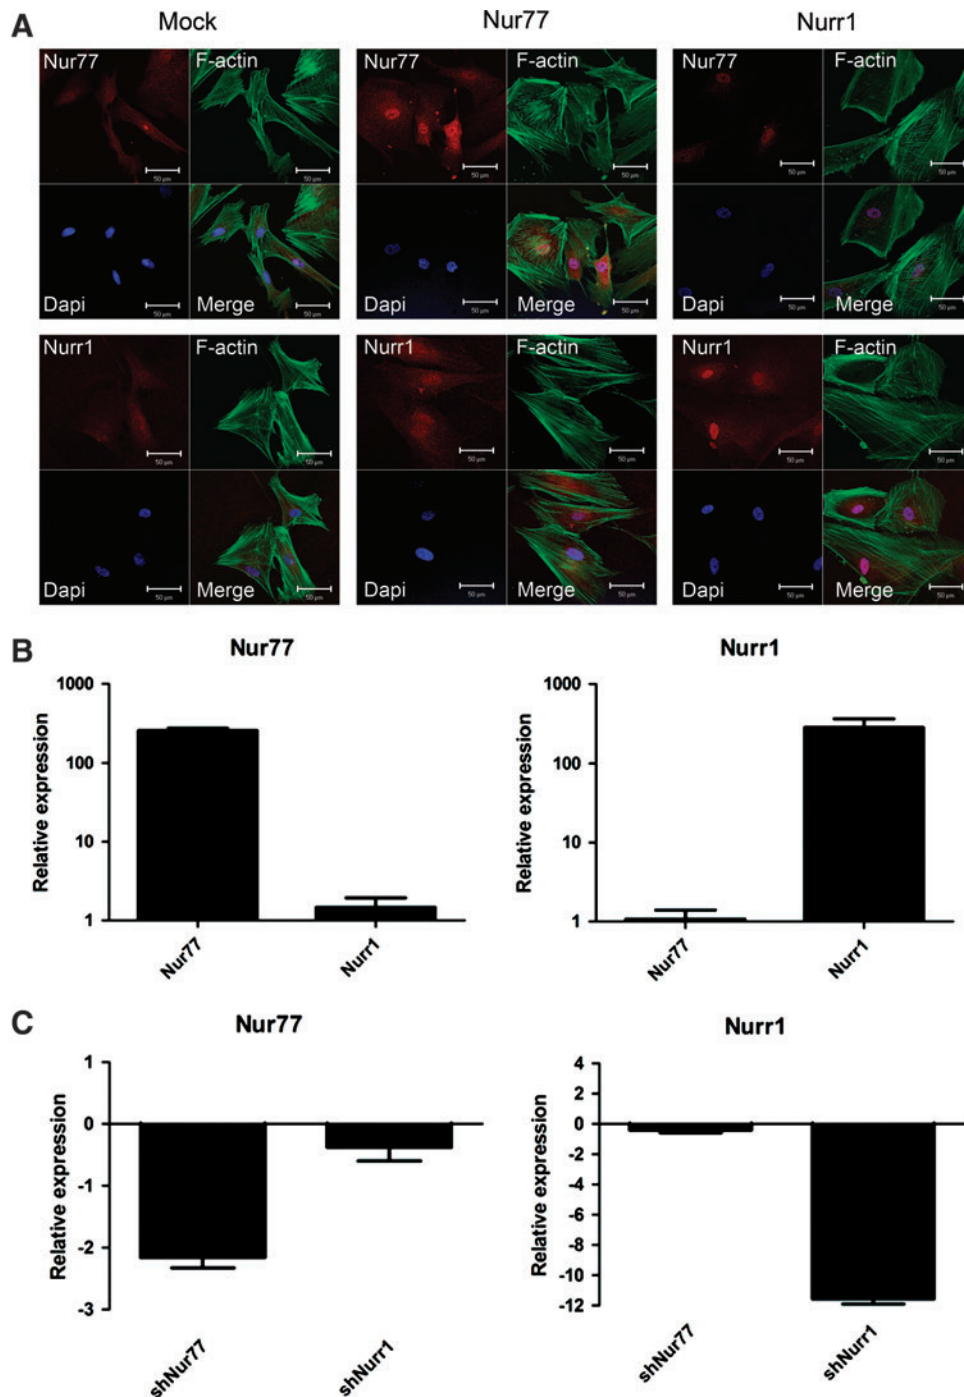

**SUPPLEMENTARY FIG. S3.** Validation of Nur77 and Nurr1 overexpression or knockdown. **(A)** Transduced MSC were seeded on fibronectin-coated glass slides, fixed, and stained for Nur77 or Nurr1 (red), F-actin by Phalloidin (green), and nuclei (blue). Clear nuclear localization of Nur77 or Nurr1 protein was observed in case of overexpression Nur77- (*middle*) or Nurr1-transduced FBMSC (*right*), respectively, whereas this was absent in mock-transduced FBMSC (*left*). Scale bar 50  $\mu$ m. Please note that the anti-Nurr1 antibody gives more background than the anti-Nur77 antibody. **(B)** Quantification of Nur77 or Nurr1 overexpression by real-time quantitative (RQ)-polymerase chain reaction. Data (mean  $\pm$  SD) were normalized to mock-transduced FBMSC. Overexpression of Nur77 (*left*) did not increase expression of Nurr1 in the same cells and vice versa. **(C)** Quantification of Nur77 and Nurr1 knockdown by real-time quantitative-polymerase chain reaction. Data (mean  $\pm$  SD) were normalized to short-hairpin control-transduced FBMSC. As basal expression of Nur77 and Nurr1 is low, the efficiency of lentiviral knockdown of Nur77 and Nurr1 is limited, whereas significant overexpression is easily achieved.

SUPPLEMENTARY TABLE S1. PRIMER SEQUENCES

| <i>Gene name</i>    | <i>Sequence forward primer 5'–3'</i> | <i>Sequence reverse primer 5'–3'</i> |
|---------------------|--------------------------------------|--------------------------------------|
| <i>ABL</i>          | TGGAGATAAACTCTAAGCATAACTAAAGGT       | TGGAGATAAACTCTAAGCATAACTAAAGGT       |
| <i>CYR61</i>        | CAGCTCCACCGCTCTGAAG                  | TTCCCGTTTIGGTAGATTCTG                |
| <i>GFP</i>          | AGCAAAGACCCCAACGAGAA                 | GGCGGCGGTCACGAA                      |
| <i>HGF</i>          | CCTCCTGCTCCCATCG                     | TAGGGTAGTCTTTGCTGATTTTTGA            |
| <i>HIST1H4B</i>     | GATAACATCCAAGGCATCACCA               | ACCCACACGCCTAGC                      |
| <i>IDO1</i>         | ACCATATTGATGAAGAAGTGGGC              | TGAACATCCAGTCATTATAAAAATCAGG         |
| <i>NR4A1(NUR77)</i> | AGGGCTGCAAGGGCTTCT                   | CCTTGTTAGCCAGGCAGATGTA               |
| <i>NR4A2(NURR1)</i> | GCCCCGGTGAGTCTGAT                    | GATAGTCAGGGTTCGCCTGG                 |
| <i>NR4A3 (NOR1)</i> | GTCAAGATTTTCATCCCATACATGC            | GAAGGGCTATATTGGGCTTGG                |
| <i>SMAD7</i>        | CCCGATGGATTTTCTCAAACC                | CCCTGTTTCAGCGGAGGA                   |
| <i>TGF-β1</i>       | AAGTGGACATCAACGGGTTT                 | CGTGGAGCTGAAGCAATAG                  |

HGF, hepatocyte growth factor; IDO, indoleamine-2,3-dioxygenase; TGF-β1, transforming growth factor-β1.

SUPPLEMENTARY TABLE S2. MESENCHYMAL STROMAL CELL PHENOTYPE ON TRANSDUCED MESENCHYMAL STROMAL CELLS

|           | <i>NT</i> | <i>Mock</i> | <i>Nur77</i> | <i>Nurr1</i> |
|-----------|-----------|-------------|--------------|--------------|
| CD73 (%)  | 98.4±0.8  | 98.2±2.5    | 97.0±2.8     | 97.4±2.0     |
| CD90 (%)  | 97.4±0.9  | 96.9±2.3    | 97.5±0.4     | 97.2±0.4     |
| CD105 (%) | 94.7±1.1  | 95.5±0.7    | 95.6±1.5     | 96.6±0.9     |
| CD45 (%)  | 3.1±0.7   | 1.3±1.4     | 2.2±1.4      | 2.5±0.8      |
| CD34 (%)  | 2.0±1.7   | 2.8±0.3     | 2.1±1.1      | 2.4±1.2      |

Data expressed as percentage positive cells (mean±SD, corrected for the isotype control from 3 individual donors) of the total population of MSC for the indicated group.

MSC, mesenchymal stromal cells; NT, nontransduced cells.
